# Supplementary material for: Predicting the Potential Global Distribution of Amblyomma americanum (Acari: Ixodidae) under Near Current and Future Climatic Conditions, Using the Maximum Entropy Model
Source: MDPI journal article supplement (doi:10.3390/biology10101057), 2021-10-18
Supplement: s1 [file s1]

**Table S1.** Climate variables used in predicting the potential geographic distribution of *A. americanum*.

| <b>Code</b> | <b>Climate Variables</b>                                  |
|-------------|-----------------------------------------------------------|
| BIO1        | Annual Mean Temperature                                   |
| BIO2        | Mean Diurnal Range(Mean of monthly(max temp – min temp))  |
| BIO3        | Isothermality(BIO2/BIO7)( $\times 100$ )                  |
| BIO4        | Temperature Seasonality(standard deviation $\times 100$ ) |
| BIO5        | Max Temperature of Warmest Month                          |
| BIO6        | Min Temperature of Coldest Month                          |
| BIO7        | Temperature Annual Range(BIO5 – BIO6)                     |
| BIO8        | Mean Temperature of Wettest Quarter                       |
| BIO9        | Mean Temperature of Driest Quarter                        |
| BIO10       | Mean Temperature of Warmest Quarter                       |
| BIO11       | Mean Temperature of Coldest Quarter                       |
| BIO12       | Annual Precipitation                                      |
| BIO13       | Precipitation of Wettest Month                            |
| BIO14       | Precipitation of Driest Month                             |
| BIO15       | Precipitation Seasonality (Coefficient of Variation)      |
| BIO16       | Precipitation of Wettest Quarter                          |
| BIO17       | Precipitation of Driest Quarter                           |
| BIO18       | Precipitation of Warmest Quarter                          |
| BIO19       | Precipitation of Coldest Quarter                          |
| Tmin1-12    | Monthly Average Minimum Temperature                       |
| Tmax1-12    | Monthly Average Maximum Temperature                       |
| Prec1-12    | Monthly Total Precipitation                               |
| Elevation   | Elevation data                                            |

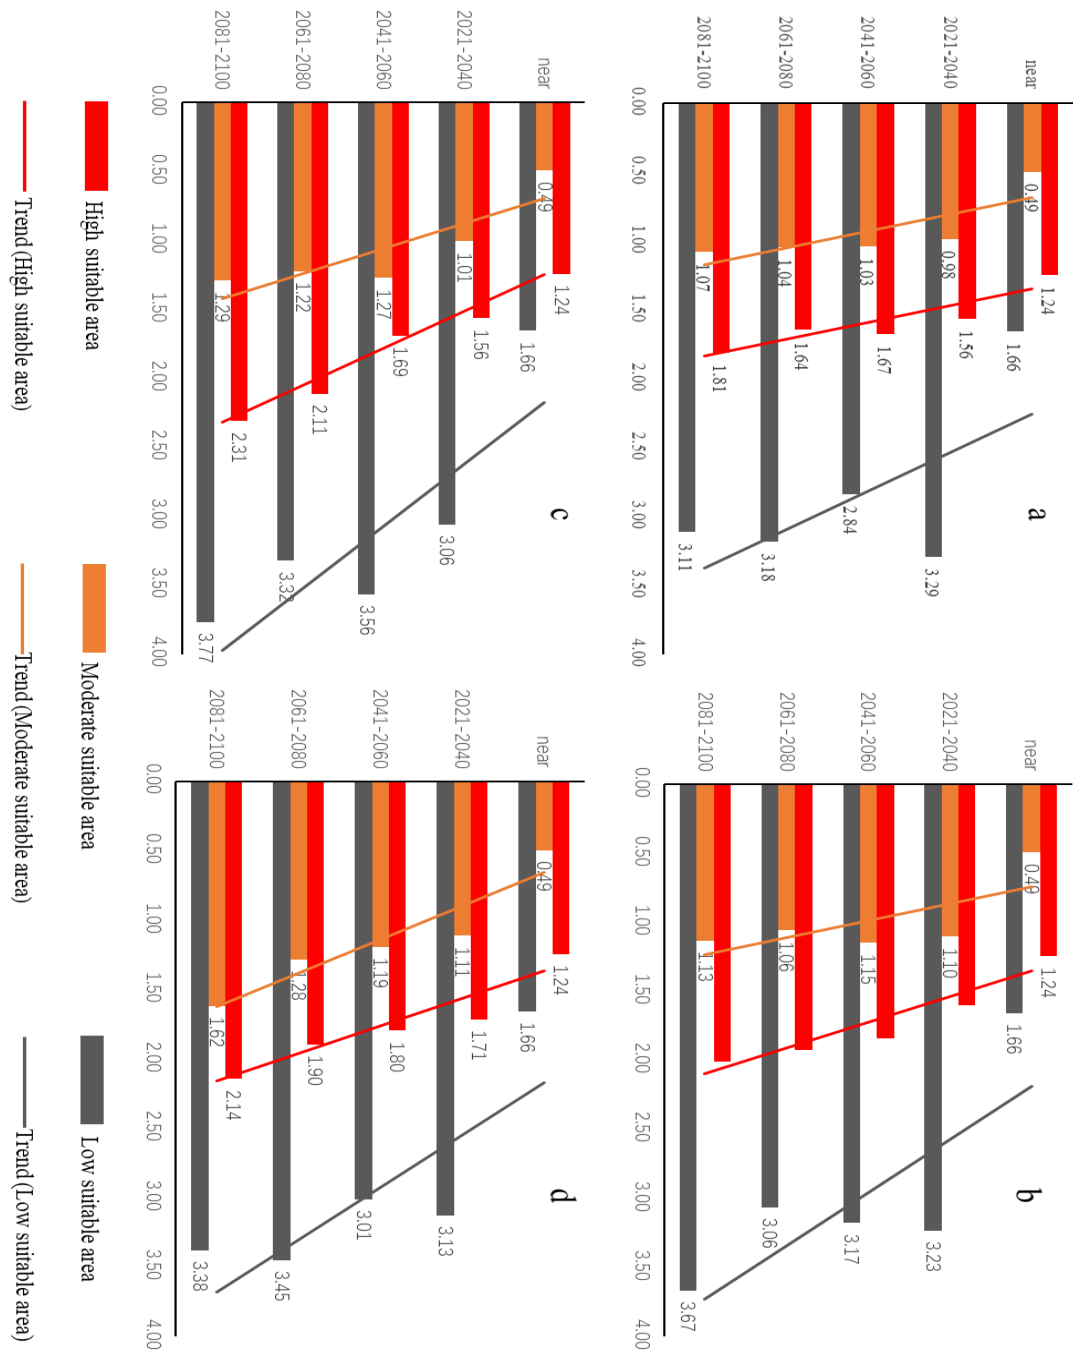

**Figure S1.** The area change ( $\times 10^6 \text{ km}^2$ ) of predicted potential distribution of *A. americanum* around the world under the future climate conditions during the periods of the 21st century under four shared social-economic pathways climate conditions, compared with the potential distribution area under the near current climate condition and four shared socio-economic pathways: (a) ssp1-2.6; (b) ssp2-4.5; (c) ssp3-7.0; (d) ssp5-8.5.
