# Supplementary material for: Predicting the Potential Global Distribution of Amblyomma americanum (Acari: Ixodidae) under Near Current and Future Climatic Conditions, Using the Maximum Entropy Model
Source: Biology (Basel). 2021 Oct 18;10(10):1057. doi: 10.3390/biology10101057 (PMC8533137; doi:10.3390/biology10101057)
Supplement: Supplementary file 1 [file biology-10-01057-s001.zip › occurrence-supplement_data.csv]

species	Longitude	Latitude
Amblyomma americanum	-114.1875	46.22916667
Amblyomma americanum	-102.5625	23.64583333
Amblyomma americanum	-101.1875	29.6875
Amblyomma americanum	-100.9791667	29.8125
Amblyomma americanum	-100.8541667	29.6875
Amblyomma americanum	-100.5208333	30.5625
Amblyomma americanum	-100.4375	29.60416667
Amblyomma americanum	-100.4375	31.47916667
Amblyomma americanum	-100.3541667	29.8125
Amblyomma americanum	-100.3125	25.77083333
Amblyomma americanum	-100.3125	29.8125
Amblyomma americanum	-100.3125	29.97916667
Amblyomma americanum	-100.1875	25.4375
Amblyomma americanum	-100.1458333	25.60416667
Amblyomma americanum	-99.77083333	29.22916667
Amblyomma americanum	-99.77083333	29.27083333
Amblyomma americanum	-99.77083333	30.47916667
Amblyomma americanum	-99.72916667	29.60416667
Amblyomma americanum	-99.60416667	29.47916667
Amblyomma americanum	-99.52083333	30.0625
Amblyomma americanum	-99.4375	36.4375
Amblyomma americanum	-99.35416667	31.14583333
Amblyomma americanum	-99.35416667	34.64583333
Amblyomma americanum	-99.3125	31.14583333
Amblyomma americanum	-99.27083333	24.0625
Amblyomma americanum	-99.14583333	23.72916667
Amblyomma americanum	-99.0625	35.4375
Amblyomma americanum	-99.02083333	31.85416667
Amblyomma americanum	-98.9375	30.3125
Amblyomma americanum	-98.8125	28.3125
Amblyomma americanum	-98.72916667	29.97916667
Amblyomma americanum	-98.72916667	31.1875
Amblyomma americanum	-98.6875	29.60416667
Amblyomma americanum	-98.64583333	34.77083333
Amblyomma americanum	-98.5625	34.6875
Amblyomma americanum	-98.52083333	29.52083333
Amblyomma americanum	-98.52083333	38.52083333
Amblyomma americanum	-98.47916667	29.4375
Amblyomma americanum	-98.47916667	31.02083333
Amblyomma americanum	-98.47916667	32.85416667
Amblyomma americanum	-98.47916667	33.89583333
Amblyomma americanum	-98.47916667	34.6875
Amblyomma americanum	-98.4375	35.9375
Amblyomma americanum	-98.39583333	26.1875
Amblyomma americanum	-98.39583333	34.6875
Amblyomma americanum	-98.22916667	26.0625
Amblyomma americanum	-98.22916667	30.72916667
Amblyomma americanum	-98.22916667	34.64583333
Amblyomma americanum	-98.1875	30.14583333
Amblyomma americanum	-97.89583333	36.35416667
Amblyomma americanum	-97.85416667	27.52083333
Amblyomma americanum	-97.85416667	30.39583333
Amblyomma americanum	-97.8125	31.14583333
Amblyomma americanum	-97.72916667	30.47916667
Amblyomma americanum	-97.72916667	39.6875
Amblyomma americanum	-97.6875	30.22916667
Amblyomma americanum	-97.6875	32.77083333
Amblyomma americanum	-97.6875	38.5625
Amblyomma americanum	-97.60416667	29.60416667
Amblyomma americanum	-97.60416667	35.52083333
Amblyomma americanum	-97.60416667	35.5625
Amblyomma americanum	-97.60416667	35.60416667
Amblyomma americanum	-97.5625	32.27083333
Amblyomma americanum	-97.5625	35.47916667
Amblyomma americanum	-97.5625	35.52083333
Amblyomma americanum	-97.5625	35.5625
Amblyomma americanum	-97.52083333	28.02083333
Amblyomma americanum	-97.52083333	35.47916667
Amblyomma americanum	-97.52083333	35.52083333
Amblyomma americanum	-97.52083333	37.22916667
Amblyomma americanum	-97.47916667	32.85416667
Amblyomma americanum	-97.47916667	32.9375
Amblyomma americanum	-97.47916667	35.22916667
Amblyomma americanum	-97.47916667	35.3125
Amblyomma americanum	-97.47916667	35.47916667
Amblyomma americanum	-97.4375	37.27083333
Amblyomma americanum	-97.4375	37.64583333
Amblyomma americanum	-97.39583333	32.77083333
Amblyomma americanum	-97.39583333	35.89583333
Amblyomma americanum	-97.39583333	36.0625
Amblyomma americanum	-97.35416667	35.1875
Amblyomma americanum	-97.35416667	35.35416667
Amblyomma americanum	-97.35416667	37.6875
Amblyomma americanum	-97.3125	32.77083333
Amblyomma americanum	-97.3125	35.22916667
Amblyomma americanum	-97.3125	37.72916667
Amblyomma americanum	-97.27083333	30.6875
Amblyomma americanum	-97.27083333	35.22916667
Amblyomma americanum	-97.27083333	35.5625
Amblyomma americanum	-97.27083333	37.72916667
Amblyomma americanum	-97.22916667	27.60416667
Amblyomma americanum	-97.22916667	35.22916667
Amblyomma americanum	-97.22916667	36.0625
Amblyomma americanum	-97.22916667	36.14583333
Amblyomma americanum	-97.1875	34.0625
Amblyomma americanum	-97.1875	35.22916667
Amblyomma americanum	-97.1875	36.10416667
Amblyomma americanum	-97.1875	36.14583333
Amblyomma americanum	-97.14583333	31.5625
Amblyomma americanum	-97.14583333	35.22916667
Amblyomma americanum	-97.14583333	35.4375
Amblyomma americanum	-97.10416667	32.72916667
Amblyomma americanum	-97.10416667	33.64583333
Amblyomma americanum	-97.10416667	37.6875
Amblyomma americanum	-97.0625	32.77083333
Amblyomma americanum	-97.0625	36.14583333
Amblyomma americanum	-97.02083333	38.97916667
Amblyomma americanum	-96.97916667	33.0625
Amblyomma americanum	-96.97916667	35.85416667
Amblyomma americanum	-96.97916667	35.89583333
Amblyomma americanum	-96.97916667	35.97916667
Amblyomma americanum	-96.9375	35.89583333
Amblyomma americanum	-96.9375	35.9375
Amblyomma americanum	-96.9375	35.97916667
Amblyomma americanum	-96.89583333	35.85416667
Amblyomma americanum	-96.89583333	35.89583333
Amblyomma americanum	-96.89583333	35.97916667
Amblyomma americanum	-96.89583333	40.9375
Amblyomma americanum	-96.89583333	40.97916667
Amblyomma americanum	-96.85416667	33.89583333
Amblyomma americanum	-96.85416667	35.97916667
Amblyomma americanum	-96.85416667	37.60416667
Amblyomma americanum	-96.85416667	40.6875
Amblyomma americanum	-96.85416667	40.72916667
Amblyomma americanum	-96.8125	33.89583333
Amblyomma americanum	-96.8125	35.9375
Amblyomma americanum	-96.8125	40.85416667
Amblyomma americanum	-96.77083333	40.64583333
Amblyomma americanum	-96.77083333	46.89583333
Amblyomma americanum	-96.72916667	34.35416667
Amblyomma americanum	-96.72916667	40.77083333
Amblyomma americanum	-96.6875	34.35416667
Amblyomma americanum	-96.6875	34.72916667
Amblyomma americanum	-96.6875	34.77083333
Amblyomma americanum	-96.6875	39.1875
Amblyomma americanum	-96.6875	40.8125
Amblyomma americanum	-96.64583333	34.22916667
Amblyomma americanum	-96.64583333	35.14583333
Amblyomma americanum	-96.64583333	40.5625
Amblyomma americanum	-96.64583333	40.77083333
Amblyomma americanum	-96.64583333	40.8125
Amblyomma americanum	-96.60416667	39.10416667
Amblyomma americanum	-96.5625	39.10416667
Amblyomma americanum	-96.5625	39.1875
Amblyomma americanum	-96.5625	40.64583333
Amblyomma americanum	-96.5625	40.85416667
Amblyomma americanum	-96.47916667	32.0625
Amblyomma americanum	-96.4375	31.3125
Amblyomma americanum	-96.39583333	30.1875
Amblyomma americanum	-96.39583333	36.60416667
Amblyomma americanum	-96.35416667	36.27083333
Amblyomma americanum	-96.3125	30.64583333
Amblyomma americanum	-96.3125	30.6875
Amblyomma americanum	-96.3125	36.1875
Amblyomma americanum	-96.27083333	36.02083333
Amblyomma americanum	-96.27083333	36.22916667
Amblyomma americanum	-96.27083333	41.02083333
Amblyomma americanum	-96.22916667	30.60416667
Amblyomma americanum	-96.22916667	38.39583333
Amblyomma americanum	-96.1875	32.39583333
Amblyomma americanum	-96.1875	36.72916667
Amblyomma americanum	-96.14583333	36.4375
Amblyomma americanum	-96.10416667	35.9375
Amblyomma americanum	-96.10416667	36.10416667
Amblyomma americanum	-96.10416667	36.52083333
Amblyomma americanum	-96.10416667	40.85416667
Amblyomma americanum	-96.10416667	41.27083333
Amblyomma americanum	-96.10416667	41.3125
Amblyomma americanum	-96.0625	35.60416667
Amblyomma americanum	-96.0625	36.60416667
Amblyomma americanum	-96.0625	39.85416667
Amblyomma americanum	-96.0625	40.1875
Amblyomma americanum	-96.02083333	36.14583333
Amblyomma americanum	-96.02083333	40.0625
Amblyomma americanum	-96.02083333	41.8125
Amblyomma americanum	-95.97916667	31.1875
Amblyomma americanum	-95.97916667	35.0625
Amblyomma americanum	-95.97916667	36.14583333
Amblyomma americanum	-95.97916667	36.6875
Amblyomma americanum	-95.97916667	41.27083333
Amblyomma americanum	-95.9375	34.8125
Amblyomma americanum	-95.9375	41.27083333
Amblyomma americanum	-95.89583333	31.89583333
Amblyomma americanum	-95.89583333	31.97916667
Amblyomma americanum	-95.89583333	32.35416667
Amblyomma americanum	-95.89583333	36.14583333
Amblyomma americanum	-95.89583333	36.22916667
Amblyomma americanum	-95.85416667	33.8125
Amblyomma americanum	-95.85416667	36.0625
Amblyomma americanum	-95.85416667	38.4375
Amblyomma americanum	-95.8125	32.85416667
Amblyomma americanum	-95.6875	30.27083333
Amblyomma americanum	-95.6875	31.77083333
Amblyomma americanum	-95.6875	33.77083333
Amblyomma americanum	-95.6875	33.8125
Amblyomma americanum	-95.6875	39.0625
Amblyomma americanum	-95.64583333	32.22916667
Amblyomma americanum	-95.64583333	33.77083333
Amblyomma americanum	-95.64583333	33.8125
Amblyomma americanum	-95.64583333	36.27083333
Amblyomma americanum	-95.64583333	36.3125
Amblyomma americanum	-95.64583333	40.60416667
Amblyomma americanum	-95.64583333	42.8125
Amblyomma americanum	-95.60416667	39.10416667
Amblyomma americanum	-95.5625	36.35416667
Amblyomma americanum	-95.5625	36.5625
Amblyomma americanum	-95.52083333	30.60416667
Amblyomma americanum	-95.52083333	40.22916667
Amblyomma americanum	-95.47916667	30.22916667
Amblyomma americanum	-95.47916667	39.85416667
Amblyomma americanum	-95.4375	29.6875
Amblyomma americanum	-95.4375	30.0625
Amblyomma americanum	-95.39583333	29.8125
Amblyomma americanum	-95.35416667	31.60416667
Amblyomma americanum	-95.35416667	34.02083333
Amblyomma americanum	-95.35416667	38.89583333
Amblyomma americanum	-95.35416667	38.9375
Amblyomma americanum	-95.3125	32.47916667
Amblyomma americanum	-95.3125	36.27083333
Amblyomma americanum	-95.27083333	35.8125
Amblyomma americanum	-95.27083333	38.97916667
Amblyomma americanum	-95.22916667	32.22916667
Amblyomma americanum	-95.22916667	32.72916667
Amblyomma americanum	-95.22916667	38.97916667
Amblyomma americanum	-95.22916667	39.0625
Amblyomma americanum	-95.1875	32.72916667
Amblyomma americanum	-95.1875	38.8125
Amblyomma americanum	-95.10416667	40.97916667
Amblyomma americanum	-95.02083333	39.9375
Amblyomma americanum	-94.97916667	32.22916667
Amblyomma americanum	-94.97916667	35.4375
Amblyomma americanum	-94.97916667	38.5625
Amblyomma americanum	-94.97916667	39.97916667
Amblyomma americanum	-94.9375	36.5625
Amblyomma americanum	-94.9375	39.27083333
Amblyomma americanum	-94.89583333	36.5625
Amblyomma americanum	-94.89583333	39.0625
Amblyomma americanum	-94.89583333	39.9375
Amblyomma americanum	-94.85416667	35.6875
Amblyomma americanum	-94.85416667	36.5625
Amblyomma americanum	-94.85416667	37.1875
Amblyomma americanum	-94.8125	33.89583333
Amblyomma americanum	-94.8125	35.5625
Amblyomma americanum	-94.8125	35.6875
Amblyomma americanum	-94.8125	38.89583333
Amblyomma americanum	-94.77083333	30.47916667
Amblyomma americanum	-94.77083333	34.1875
Amblyomma americanum	-94.77083333	36.60416667
Amblyomma americanum	-94.77083333	39.85416667
Amblyomma americanum	-94.72916667	31.97916667
Amblyomma americanum	-94.72916667	34.02083333
Amblyomma americanum	-94.72916667	34.14583333
Amblyomma americanum	-94.72916667	34.1875
Amblyomma americanum	-94.72916667	34.64583333
Amblyomma americanum	-94.6875	31.35416667
Amblyomma americanum	-94.6875	34.14583333
Amblyomma americanum	-94.6875	34.1875
Amblyomma americanum	-94.6875	39.3125
Amblyomma americanum	-94.6875	40.5625
Amblyomma americanum	-94.64583333	31.60416667
Amblyomma americanum	-94.64583333	34.3125
Amblyomma americanum	-94.64583333	34.47916667
Amblyomma americanum	-94.64583333	40.5625
Amblyomma americanum	-94.60416667	35.0625
Amblyomma americanum	-94.5625	34.02083333
Amblyomma americanum	-94.5625	35.47916667
Amblyomma americanum	-94.52083333	39.27083333
Amblyomma americanum	-94.52083333	40.14583333
Amblyomma americanum	-94.47916667	40.60416667
Amblyomma americanum	-94.4375	30.77083333
Amblyomma americanum	-94.4375	35.3125
Amblyomma americanum	-94.4375	39.27083333
Amblyomma americanum	-94.4375	42.72916667
Amblyomma americanum	-94.39583333	38.52083333
Amblyomma americanum	-94.35416667	30.47916667
Amblyomma americanum	-94.35416667	36.47916667
Amblyomma americanum	-94.35416667	36.52083333
Amblyomma americanum	-94.35416667	36.97916667
Amblyomma americanum	-94.35416667	38.64583333
Amblyomma americanum	-94.35416667	39.02083333
Amblyomma americanum	-94.3125	36.47916667
Amblyomma americanum	-94.27083333	31.0625
Amblyomma americanum	-94.27083333	33.4375
Amblyomma americanum	-94.27083333	36.35416667
Amblyomma americanum	-94.27083333	36.85416667
Amblyomma americanum	-94.27083333	39.39583333
Amblyomma americanum	-94.22916667	30.72916667
Amblyomma americanum	-94.22916667	35.77083333
Amblyomma americanum	-94.22916667	35.97916667
Amblyomma americanum	-94.22916667	36.0625
Amblyomma americanum	-94.22916667	40.72916667
Amblyomma americanum	-94.1875	35.27083333
Amblyomma americanum	-94.1875	35.47916667
Amblyomma americanum	-94.1875	35.89583333
Amblyomma americanum	-94.1875	36.02083333
Amblyomma americanum	-94.1875	36.0625
Amblyomma americanum	-94.1875	36.89583333
Amblyomma americanum	-94.1875	41.27083333
Amblyomma americanum	-94.14583333	36.0625
Amblyomma americanum	-94.14583333	37.9375
Amblyomma americanum	-94.14583333	40.5625
Amblyomma americanum	-94.10416667	36.0625
Amblyomma americanum	-94.10416667	36.14583333
Amblyomma americanum	-94.10416667	36.3125
Amblyomma americanum	-94.0625	36.0625
Amblyomma americanum	-94.0625	36.64583333
Amblyomma americanum	-94.02083333	37.97916667
Amblyomma americanum	-94.02083333	41.3125
Amblyomma americanum	-93.97916667	42.39583333
Amblyomma americanum	-93.9375	37.1875
Amblyomma americanum	-93.9375	40.60416667
Amblyomma americanum	-93.85416667	41.22916667
Amblyomma americanum	-93.77083333	36.5625
Amblyomma americanum	-93.77083333	40.60416667
Amblyomma americanum	-93.77083333	40.72916667
Amblyomma americanum	-93.72916667	31.1875
Amblyomma americanum	-93.72916667	40.5625
Amblyomma americanum	-93.72916667	40.72916667
Amblyomma americanum	-93.6875	34.64583333
Amblyomma americanum	-93.6875	37.5625
Amblyomma americanum	-93.64583333	32.52083333
Amblyomma americanum	-93.64583333	34.47916667
Amblyomma americanum	-93.64583333	34.5625
Amblyomma americanum	-93.64583333	41.1875
Amblyomma americanum	-93.60416667	35.5625
Amblyomma americanum	-93.60416667	38.72916667
Amblyomma americanum	-93.5625	38.77083333
Amblyomma americanum	-93.52083333	36.72916667
Amblyomma americanum	-93.47916667	40.85416667
Amblyomma americanum	-93.47916667	41.02083333
Amblyomma americanum	-93.4375	38.27083333
Amblyomma americanum	-93.4375	40.9375
Amblyomma americanum	-93.39583333	37.14583333
Amblyomma americanum	-93.39583333	37.5625
Amblyomma americanum	-93.39583333	37.9375
Amblyomma americanum	-93.3125	35.52083333
Amblyomma americanum	-93.3125	37.22916667
Amblyomma americanum	-93.27083333	37.10416667
Amblyomma americanum	-93.22916667	35.89583333
Amblyomma americanum	-93.22916667	36.64583333
Amblyomma americanum	-93.22916667	36.89583333
Amblyomma americanum	-93.22916667	38.35416667
Amblyomma americanum	-93.22916667	38.77083333
Amblyomma americanum	-93.1875	33.35416667
Amblyomma americanum	-93.1875	35.3125
Amblyomma americanum	-93.1875	35.97916667
Amblyomma americanum	-93.1875	36.02083333
Amblyomma americanum	-93.14583333	34.4375
Amblyomma americanum	-93.14583333	36.89583333
Amblyomma americanum	-93.10416667	31.14583333
Amblyomma americanum	-93.10416667	36.02083333
Amblyomma americanum	-93.10416667	36.22916667
Amblyomma americanum	-93.10416667	41.89583333
Amblyomma americanum	-93.0625	34.47916667
Amblyomma americanum	-93.0625	34.52083333
Amblyomma americanum	-93.0625	40.97916667
Amblyomma americanum	-93.0625	41.39583333
Amblyomma americanum	-93.02083333	37.22916667
Amblyomma americanum	-92.9375	34.60416667
Amblyomma americanum	-92.9375	40.77083333
Amblyomma americanum	-92.89583333	39.0625
Amblyomma americanum	-92.85416667	38.1875
Amblyomma americanum	-92.85416667	40.0625
Amblyomma americanum	-92.85416667	40.72916667
Amblyomma americanum	-92.8125	40.27083333
Amblyomma americanum	-92.8125	40.89583333
Amblyomma americanum	-92.8125	44.6875
Amblyomma americanum	-92.77083333	32.60416667
Amblyomma americanum	-92.77083333	41.35416667
Amblyomma americanum	-92.77083333	42.5625
Amblyomma americanum	-92.72916667	35.97916667
Amblyomma americanum	-92.6875	34.52083333
Amblyomma americanum	-92.6875	38.14583333
Amblyomma americanum	-92.6875	39.14583333
Amblyomma americanum	-92.64583333	40.10416667
Amblyomma americanum	-92.60416667	36.27083333
Amblyomma americanum	-92.60416667	38.10416667
Amblyomma americanum	-92.60416667	38.14583333
Amblyomma americanum	-92.60416667	38.3125
Amblyomma americanum	-92.60416667	40.14583333
Amblyomma americanum	-92.60416667	40.1875
Amblyomma americanum	-92.5625	35.8125
Amblyomma americanum	-92.5625	38.89583333
Amblyomma americanum	-92.5625	38.97916667
Amblyomma americanum	-92.52083333	39.60416667
Amblyomma americanum	-92.47916667	35.10416667
Amblyomma americanum	-92.47916667	36.85416667
Amblyomma americanum	-92.4375	35.72916667
Amblyomma americanum	-92.4375	36.6875
Amblyomma americanum	-92.4375	38.9375
Amblyomma americanum	-92.4375	39.72916667
Amblyomma americanum	-92.4375	42.52083333
Amblyomma americanum	-92.39583333	31.02083333
Amblyomma americanum	-92.39583333	38.9375
Amblyomma americanum	-92.35416667	38.9375
Amblyomma americanum	-92.35416667	42.47916667
Amblyomma americanum	-92.3125	34.72916667
Amblyomma americanum	-92.3125	34.77083333
Amblyomma americanum	-92.3125	37.39583333
Amblyomma americanum	-92.3125	38.60416667
Amblyomma americanum	-92.3125	38.89583333
Amblyomma americanum	-92.27083333	35.27083333
Amblyomma americanum	-92.27083333	37.52083333
Amblyomma americanum	-92.27083333	38.8125
Amblyomma americanum	-92.22916667	38.60416667
Amblyomma americanum	-92.22916667	43.3125
Amblyomma americanum	-92.1875	35.97916667
Amblyomma americanum	-92.1875	37.8125
Amblyomma americanum	-92.14583333	34.89583333
Amblyomma americanum	-92.14583333	38.8125
Amblyomma americanum	-92.10416667	34.3125
Amblyomma americanum	-92.10416667	34.4375
Amblyomma americanum	-92.10416667	36.8125
Amblyomma americanum	-92.10416667	37.97916667
Amblyomma americanum	-92.0625	36.89583333
Amblyomma americanum	-92.02083333	42.3125
Amblyomma americanum	-91.97916667	40.72916667
Amblyomma americanum	-91.9375	36.72916667
Amblyomma americanum	-91.9375	39.77083333
Amblyomma americanum	-91.9375	40.89583333
Amblyomma americanum	-91.9375	43.0625
Amblyomma americanum	-91.89583333	34.22916667
Amblyomma americanum	-91.89583333	36.85416667
Amblyomma americanum	-91.8125	35.72916667
Amblyomma americanum	-91.8125	36.64583333
Amblyomma americanum	-91.8125	42.85416667
Amblyomma americanum	-91.77083333	36.64583333
Amblyomma americanum	-91.77083333	42.1875
Amblyomma americanum	-91.72916667	38.89583333
Amblyomma americanum	-91.6875	37.10416667
Amblyomma americanum	-91.6875	40.47916667
Amblyomma americanum	-91.6875	40.60416667
Amblyomma americanum	-91.6875	41.97916667
Amblyomma americanum	-91.64583333	40.27083333
Amblyomma americanum	-91.5625	40.52083333
Amblyomma americanum	-91.5625	40.64583333
Amblyomma americanum	-91.5625	40.97916667
Amblyomma americanum	-91.52083333	41.64583333
Amblyomma americanum	-91.52083333	42.60416667
Amblyomma americanum	-91.47916667	36.3125
Amblyomma americanum	-91.47916667	38.35416667
Amblyomma americanum	-91.47916667	40.52083333
Amblyomma americanum	-91.4375	31.35416667
Amblyomma americanum	-91.4375	37.14583333
Amblyomma americanum	-91.4375	37.1875
Amblyomma americanum	-91.39583333	40.39583333
Amblyomma americanum	-91.39583333	40.8125
Amblyomma americanum	-91.35416667	39.72916667
Amblyomma americanum	-91.3125	31.10416667
Amblyomma americanum	-91.3125	36.72916667
Amblyomma americanum	-91.3125	38.3125
Amblyomma americanum	-91.3125	40.64583333
Amblyomma americanum	-91.27083333	40.77083333
Amblyomma americanum	-91.27083333	40.8125
Amblyomma americanum	-91.22916667	30.77083333
Amblyomma americanum	-91.22916667	31.60416667
Amblyomma americanum	-91.22916667	38.0625
Amblyomma americanum	-91.22916667	40.60416667
Amblyomma americanum	-91.1875	32.39583333
Amblyomma americanum	-91.1875	37.02083333
Amblyomma americanum	-91.1875	43.0625
Amblyomma americanum	-91.14583333	36.0625
Amblyomma americanum	-91.10416667	38.72916667
Amblyomma americanum	-91.10416667	38.77083333
Amblyomma americanum	-91.10416667	40.8125
Amblyomma americanum	-91.0625	36.77083333
Amblyomma americanum	-91.0625	37.0625
Amblyomma americanum	-91.0625	37.3125
Amblyomma americanum	-91.0625	38.77083333
Amblyomma americanum	-91.02083333	37.1875
Amblyomma americanum	-91.02083333	38.10416667
Amblyomma americanum	-91.02083333	43.4375
Amblyomma americanum	-90.97916667	31.22916667
Amblyomma americanum	-90.97916667	31.52083333
Amblyomma americanum	-90.97916667	36.27083333
Amblyomma americanum	-90.97916667	37.1875
Amblyomma americanum	-90.9375	39.02083333
Amblyomma americanum	-90.9375	39.0625
Amblyomma americanum	-90.9375	40.39583333
Amblyomma americanum	-90.89583333	37.3125
Amblyomma americanum	-90.85416667	37.97916667
Amblyomma americanum	-90.85416667	38.8125
Amblyomma americanum	-90.8125	38.47916667
Amblyomma americanum	-90.8125	38.60416667
Amblyomma americanum	-90.8125	39.1875
Amblyomma americanum	-90.77083333	38.64583333
Amblyomma americanum	-90.77083333	38.77083333
Amblyomma americanum	-90.72916667	35.14583333
Amblyomma americanum	-90.72916667	35.77083333
Amblyomma americanum	-90.72916667	38.6875
Amblyomma americanum	-90.72916667	38.77083333
Amblyomma americanum	-90.72916667	40.10416667
Amblyomma americanum	-90.6875	31.85416667
Amblyomma americanum	-90.6875	35.52083333
Amblyomma americanum	-90.6875	35.77083333
Amblyomma americanum	-90.6875	35.9375
Amblyomma americanum	-90.6875	38.10416667
Amblyomma americanum	-90.6875	38.60416667
Amblyomma americanum	-90.6875	38.8125
Amblyomma americanum	-90.64583333	35.97916667
Amblyomma americanum	-90.64583333	36.0625
Amblyomma americanum	-90.64583333	38.4375
Amblyomma americanum	-90.64583333	38.5625
Amblyomma americanum	-90.64583333	38.60416667
Amblyomma americanum	-90.60416667	38.8125
Amblyomma americanum	-90.5625	32.60416667
Amblyomma americanum	-90.5625	38.52083333
Amblyomma americanum	-90.5625	40.14583333
Amblyomma americanum	-90.52083333	32.60416667
Amblyomma americanum	-90.52083333	37.22916667
Amblyomma americanum	-90.52083333	37.27083333
Amblyomma americanum	-90.52083333	38.52083333
Amblyomma americanum	-90.52083333	38.97916667
Amblyomma americanum	-90.47916667	38.64583333
Amblyomma americanum	-90.47916667	38.6875
Amblyomma americanum	-90.47916667	39.85416667
Amblyomma americanum	-90.4375	37.77083333
Amblyomma americanum	-90.4375	38.22916667
Amblyomma americanum	-90.4375	38.5625
Amblyomma americanum	-90.39583333	37.39583333
Amblyomma americanum	-90.35416667	36.9375
Amblyomma americanum	-90.27083333	31.10416667
Amblyomma americanum	-90.22916667	37.8125
Amblyomma americanum	-90.1875	38.60416667
Amblyomma americanum	-90.10416667	30.39583333
Amblyomma americanum	-90.10416667	32.14583333
Amblyomma americanum	-90.10416667	40.3125
Amblyomma americanum	-90.0625	30.35416667
Amblyomma americanum	-90.0625	32.47916667
Amblyomma americanum	-90.0625	40.27083333
Amblyomma americanum	-90.02083333	30.35416667
Amblyomma americanum	-89.97916667	36.9375
Amblyomma americanum	-89.97916667	38.4375
Amblyomma americanum	-89.9375	34.8125
Amblyomma americanum	-89.9375	40.14583333
Amblyomma americanum	-89.9375	40.39583333
Amblyomma americanum	-89.89583333	36.85416667
Amblyomma americanum	-89.89583333	40.02083333
Amblyomma americanum	-89.85416667	40.14583333
Amblyomma americanum	-89.8125	35.10416667
Amblyomma americanum	-89.77083333	38.27083333
Amblyomma americanum	-89.6875	35.10416667
Amblyomma americanum	-89.5625	40.72916667
Amblyomma americanum	-89.47916667	34.64583333
Amblyomma americanum	-89.47916667	34.6875
Amblyomma americanum	-89.47916667	38.4375
Amblyomma americanum	-89.4375	37.3125
Amblyomma americanum	-89.39583333	37.6875
Amblyomma americanum	-89.39583333	37.72916667
Amblyomma americanum	-89.39583333	37.77083333
Amblyomma americanum	-89.35416667	31.27083333
Amblyomma americanum	-89.35416667	34.4375
Amblyomma americanum	-89.35416667	37.47916667
Amblyomma americanum	-89.3125	37.6875
Amblyomma americanum	-89.3125	37.72916667
Amblyomma americanum	-89.3125	37.77083333
Amblyomma americanum	-89.27083333	37.52083333
Amblyomma americanum	-89.27083333	37.64583333
Amblyomma americanum	-89.27083333	37.6875
Amblyomma americanum	-89.27083333	37.72916667
Amblyomma americanum	-89.27083333	37.77083333
Amblyomma americanum	-89.22916667	35.10416667
Amblyomma americanum	-89.22916667	37.47916667
Amblyomma americanum	-89.22916667	37.6875
Amblyomma americanum	-89.22916667	37.72916667
Amblyomma americanum	-89.1875	31.1875
Amblyomma americanum	-89.1875	37.72916667
Amblyomma americanum	-89.1875	37.77083333
Amblyomma americanum	-89.14583333	31.5625
Amblyomma americanum	-89.14583333	34.72916667
Amblyomma americanum	-89.10416667	37.64583333
Amblyomma americanum	-89.0625	37.77083333
Amblyomma americanum	-89.02083333	36.8125
Amblyomma americanum	-89.02083333	37.27083333
Amblyomma americanum	-88.97916667	33.89583333
Amblyomma americanum	-88.9375	37.35416667
Amblyomma americanum	-88.9375	37.39583333
Amblyomma americanum	-88.9375	37.6875
Amblyomma americanum	-88.9375	38.10416667
Amblyomma americanum	-88.89583333	33.4375
Amblyomma americanum	-88.89583333	37.6875
Amblyomma americanum	-88.85416667	33.27083333
Amblyomma americanum	-88.8125	30.4375
Amblyomma americanum	-88.8125	33.39583333
Amblyomma americanum	-88.8125	33.5625
Amblyomma americanum	-88.77083333	33.22916667
Amblyomma americanum	-88.77083333	33.27083333
Amblyomma americanum	-88.6875	37.10416667
Amblyomma americanum	-88.6875	37.5625
Amblyomma americanum	-88.64583333	30.39583333
Amblyomma americanum	-88.64583333	34.22916667
Amblyomma americanum	-88.64583333	37.39583333
Amblyomma americanum	-88.64583333	39.5625
Amblyomma americanum	-88.64583333	39.60416667
Amblyomma americanum	-88.60416667	33.4375
Amblyomma americanum	-88.60416667	34.22916667
Amblyomma americanum	-88.5625	32.5625
Amblyomma americanum	-88.47916667	37.6875
Amblyomma americanum	-88.4375	33.47916667
Amblyomma americanum	-88.4375	33.64583333
Amblyomma americanum	-88.4375	38.4375
Amblyomma americanum	-88.4375	42.27083333
Amblyomma americanum	-88.39583333	37.60416667
Amblyomma americanum	-88.35416667	42.6875
Amblyomma americanum	-88.3125	41.27083333
Amblyomma americanum	-88.27083333	32.02083333
Amblyomma americanum	-88.27083333	37.60416667
Amblyomma americanum	-88.22916667	37.02083333
Amblyomma americanum	-88.22916667	40.10416667
Amblyomma americanum	-88.1875	34.60416667
Amblyomma americanum	-88.1875	36.97916667
Amblyomma americanum	-88.1875	40.10416667
Amblyomma americanum	-88.10416667	36.77083333
Amblyomma americanum	-88.02083333	30.8125
Amblyomma americanum	-88.02083333	36.47916667
Amblyomma americanum	-88.02083333	36.72916667
Amblyomma americanum	-88.02083333	36.89583333
Amblyomma americanum	-87.97916667	35.39583333
Amblyomma americanum	-87.97916667	36.64583333
Amblyomma americanum	-87.97916667	41.02083333
Amblyomma americanum	-87.97916667	41.14583333
Amblyomma americanum	-87.9375	36.60416667
Amblyomma americanum	-87.89583333	30.72916667
Amblyomma americanum	-87.8125	33.35416667
Amblyomma americanum	-87.8125	34.64583333
Amblyomma americanum	-87.8125	40.72916667
Amblyomma americanum	-87.8125	42.22916667
Amblyomma americanum	-87.77083333	30.89583333
Amblyomma americanum	-87.77083333	33.3125
Amblyomma americanum	-87.77083333	41.97916667
Amblyomma americanum	-87.72916667	34.89583333
Amblyomma americanum	-87.72916667	41.97916667
Amblyomma americanum	-87.6875	30.27083333
Amblyomma americanum	-87.6875	31.02083333
Amblyomma americanum	-87.6875	32.85416667
Amblyomma americanum	-87.64583333	32.85416667
Amblyomma americanum	-87.64583333	33.02083333
Amblyomma americanum	-87.64583333	34.89583333
Amblyomma americanum	-87.64583333	36.89583333
Amblyomma americanum	-87.64583333	41.9375
Amblyomma americanum	-87.60416667	33.22916667
Amblyomma americanum	-87.60416667	36.64583333
Amblyomma americanum	-87.5625	33.22916667
Amblyomma americanum	-87.5625	37.9375
Amblyomma americanum	-87.5625	40.97916667
Amblyomma americanum	-87.52083333	33.1875
Amblyomma americanum	-87.52083333	33.27083333
Amblyomma americanum	-87.52083333	35.72916667
Amblyomma americanum	-87.52083333	37.35416667
Amblyomma americanum	-87.52083333	37.64583333
Amblyomma americanum	-87.47916667	32.97916667
Amblyomma americanum	-87.47916667	33.1875
Amblyomma americanum	-87.47916667	33.27083333
Amblyomma americanum	-87.47916667	37.3125
Amblyomma americanum	-87.47916667	37.89583333
Amblyomma americanum	-87.47916667	41.02083333
Amblyomma americanum	-87.4375	30.3125
Amblyomma americanum	-87.4375	33.27083333
Amblyomma americanum	-87.4375	36.64583333
Amblyomma americanum	-87.4375	41.10416667
Amblyomma americanum	-87.39583333	30.35416667
Amblyomma americanum	-87.39583333	36.52083333
Amblyomma americanum	-87.39583333	41.60416667
Amblyomma americanum	-87.35416667	34.02083333
Amblyomma americanum	-87.35416667	34.8125
Amblyomma americanum	-87.35416667	35.22916667
Amblyomma americanum	-87.27083333	32.14583333
Amblyomma americanum	-87.27083333	41.14583333
Amblyomma americanum	-87.27083333	41.60416667
Amblyomma americanum	-87.22916667	30.4375
Amblyomma americanum	-87.22916667	32.6875
Amblyomma americanum	-87.22916667	34.0625
Amblyomma americanum	-87.22916667	39.1875
Amblyomma americanum	-87.1875	34.02083333
Amblyomma americanum	-87.10416667	33.3125
Amblyomma americanum	-87.0625	36.5625
Amblyomma americanum	-87.0625	41.47916667
Amblyomma americanum	-87.02083333	33.1875
Amblyomma americanum	-87.02083333	37.22916667
Amblyomma americanum	-86.9375	35.72916667
Amblyomma americanum	-86.9375	35.77083333
Amblyomma americanum	-86.9375	37.52083333
Amblyomma americanum	-86.89583333	33.5625
Amblyomma americanum	-86.89583333	35.77083333
Amblyomma americanum	-86.89583333	35.8125
Amblyomma americanum	-86.89583333	36.02083333
Amblyomma americanum	-86.89583333	38.89583333
Amblyomma americanum	-86.85416667	33.14583333
Amblyomma americanum	-86.85416667	34.97916667
Amblyomma americanum	-86.85416667	36.02083333
Amblyomma americanum	-86.85416667	36.47916667
Amblyomma americanum	-86.85416667	40.4375
Amblyomma americanum	-86.8125	33.22916667
Amblyomma americanum	-86.8125	33.35416667
Amblyomma americanum	-86.8125	33.52083333
Amblyomma americanum	-86.8125	35.39583333
Amblyomma americanum	-86.8125	36.10416667
Amblyomma americanum	-86.8125	37.64583333
Amblyomma americanum	-86.77083333	33.4375
Amblyomma americanum	-86.77083333	35.9375
Amblyomma americanum	-86.72916667	37.97916667
Amblyomma americanum	-86.72916667	38.8125
Amblyomma americanum	-86.6875	38.4375
Amblyomma americanum	-86.64583333	38.02083333
Amblyomma americanum	-86.64583333	40.47916667
Amblyomma americanum	-86.60416667	34.8125
Amblyomma americanum	-86.60416667	36.10416667
Amblyomma americanum	-86.60416667	36.3125
Amblyomma americanum	-86.60416667	38.1875
Amblyomma americanum	-86.60416667	38.4375
Amblyomma americanum	-86.5625	30.6875
Amblyomma americanum	-86.5625	33.85416667
Amblyomma americanum	-86.5625	34.52083333
Amblyomma americanum	-86.5625	36.10416667
Amblyomma americanum	-86.5625	36.72916667
Amblyomma americanum	-86.5625	39.10416667
Amblyomma americanum	-86.52083333	34.60416667
Amblyomma americanum	-86.52083333	34.64583333
Amblyomma americanum	-86.52083333	34.6875
Amblyomma americanum	-86.52083333	36.0625
Amblyomma americanum	-86.52083333	36.10416667
Amblyomma americanum	-86.52083333	36.27083333
Amblyomma americanum	-86.52083333	38.0625
Amblyomma americanum	-86.52083333	38.4375
Amblyomma americanum	-86.52083333	39.14583333
Amblyomma americanum	-86.47916667	30.52083333
Amblyomma americanum	-86.47916667	34.64583333
Amblyomma americanum	-86.47916667	39.1875
Amblyomma americanum	-86.4375	33.85416667
Amblyomma americanum	-86.4375	39.3125
Amblyomma americanum	-86.35416667	32.89583333
Amblyomma americanum	-86.35416667	34.60416667
Amblyomma americanum	-86.35416667	39.14583333
Amblyomma americanum	-86.3125	30.6875
Amblyomma americanum	-86.3125	36.0625
Amblyomma americanum	-86.3125	38.1875
Amblyomma americanum	-86.27083333	32.27083333
Amblyomma americanum	-86.27083333	34.60416667
Amblyomma americanum	-86.27083333	34.64583333
Amblyomma americanum	-86.27083333	35.77083333
Amblyomma americanum	-86.22916667	34.64583333
Amblyomma americanum	-86.22916667	37.39583333
Amblyomma americanum	-86.22916667	38.3125
Amblyomma americanum	-86.1875	37.97916667
Amblyomma americanum	-86.1875	38.47916667
Amblyomma americanum	-86.1875	39.27083333
Amblyomma americanum	-86.14583333	39.77083333
Amblyomma americanum	-86.10416667	35.47916667
Amblyomma americanum	-86.10416667	37.14583333
Amblyomma americanum	-86.10416667	39.14583333
Amblyomma americanum	-86.0625	38.8125
Amblyomma americanum	-86.02083333	34.89583333
Amblyomma americanum	-86.02083333	35.8125
Amblyomma americanum	-86.02083333	39.1875
Amblyomma americanum	-86.02083333	39.27083333
Amblyomma americanum	-85.9375	36.27083333
Amblyomma americanum	-85.9375	36.4375
Amblyomma americanum	-85.9375	37.14583333
Amblyomma americanum	-85.9375	37.39583333
Amblyomma americanum	-85.85416667	38.9375
Amblyomma americanum	-85.8125	33.6875
Amblyomma americanum	-85.8125	34.97916667
Amblyomma americanum	-85.77083333	32.8125
Amblyomma americanum	-85.77083333	33.72916667
Amblyomma americanum	-85.77083333	33.8125
Amblyomma americanum	-85.77083333	35.27083333
Amblyomma americanum	-85.77083333	38.10416667
Amblyomma americanum	-85.77083333	38.14583333
Amblyomma americanum	-85.72916667	30.10416667
Amblyomma americanum	-85.72916667	30.14583333
Amblyomma americanum	-85.72916667	31.39583333
Amblyomma americanum	-85.6875	34.27083333
Amblyomma americanum	-85.6875	37.97916667
Amblyomma americanum	-85.64583333	34.39583333
Amblyomma americanum	-85.64583333	34.60416667
Amblyomma americanum	-85.60416667	33.72916667
Amblyomma americanum	-85.60416667	33.77083333
Amblyomma americanum	-85.60416667	34.52083333
Amblyomma americanum	-85.60416667	35.0625
Amblyomma americanum	-85.60416667	38.39583333
Amblyomma americanum	-85.60416667	42.27083333
Amblyomma americanum	-85.5625	30.0625
Amblyomma americanum	-85.5625	33.77083333
Amblyomma americanum	-85.52083333	33.6875
Amblyomma americanum	-85.47916667	31.97916667
Amblyomma americanum	-85.47916667	33.22916667
Amblyomma americanum	-85.47916667	34.02083333
Amblyomma americanum	-85.47916667	35.1875
Amblyomma americanum	-85.47916667	35.47916667
Amblyomma americanum	-85.47916667	36.1875
Amblyomma americanum	-85.47916667	37.8125
Amblyomma americanum	-85.4375	33.97916667
Amblyomma americanum	-85.4375	38.77083333
Amblyomma americanum	-85.39583333	34.89583333
Amblyomma americanum	-85.39583333	34.9375
Amblyomma americanum	-85.35416667	32.60416667
Amblyomma americanum	-85.35416667	34.97916667
Amblyomma americanum	-85.35416667	35.02083333
Amblyomma americanum	-85.35416667	35.0625
Amblyomma americanum	-85.3125	35.02083333
Amblyomma americanum	-85.3125	36.52083333
Amblyomma americanum	-85.3125	38.85416667
Amblyomma americanum	-85.27083333	38.47916667
Amblyomma americanum	-85.22916667	30.8125
Amblyomma americanum	-85.22916667	32.77083333
Amblyomma americanum	-85.22916667	35.39583333
Amblyomma americanum	-85.1875	35.27083333
Amblyomma americanum	-85.14583333	29.64583333
Amblyomma americanum	-85.14583333	35.1875
Amblyomma americanum	-85.14583333	37.97916667
Amblyomma americanum	-85.10416667	35.14583333
Amblyomma americanum	-85.10416667	35.1875
Amblyomma americanum	-85.0625	35.85416667
Amblyomma americanum	-85.02083333	32.5625
Amblyomma americanum	-85.02083333	35.02083333
Amblyomma americanum	-85.02083333	35.0625
Amblyomma americanum	-85.02083333	35.89583333
Amblyomma americanum	-84.97916667	30.02083333
Amblyomma americanum	-84.97916667	32.47916667
Amblyomma americanum	-84.97916667	33.4375
Amblyomma americanum	-84.9375	35.10416667
Amblyomma americanum	-84.89583333	34.52083333
Amblyomma americanum	-84.89583333	36.97916667
Amblyomma americanum	-84.89583333	37.52083333
Amblyomma americanum	-84.89583333	37.5625
Amblyomma americanum	-84.85416667	37.60416667
Amblyomma americanum	-84.85416667	38.1875
Amblyomma americanum	-84.8125	33.60416667
Amblyomma americanum	-84.8125	36.5625
Amblyomma americanum	-84.77083333	33.6875
Amblyomma americanum	-84.72916667	33.52083333
Amblyomma americanum	-84.6875	35.77083333
Amblyomma americanum	-84.6875	36.5625
Amblyomma americanum	-84.64583333	33.72916667
Amblyomma americanum	-84.64583333	36.47916667
Amblyomma americanum	-84.60416667	33.39583333
Amblyomma americanum	-84.52083333	38.0625
Amblyomma americanum	-84.52083333	39.1875
Amblyomma americanum	-84.47916667	30.0625
Amblyomma americanum	-84.47916667	33.39583333
Amblyomma americanum	-84.4375	30.52083333
Amblyomma americanum	-84.4375	37.47916667
Amblyomma americanum	-84.4375	39.14583333
Amblyomma americanum	-84.39583333	33.72916667
Amblyomma americanum	-84.35416667	30.47916667
Amblyomma americanum	-84.35416667	33.6875
Amblyomma americanum	-84.35416667	33.8125
Amblyomma americanum	-84.35416667	37.89583333
Amblyomma americanum	-84.35416667	39.27083333
Amblyomma americanum	-84.3125	30.4375
Amblyomma americanum	-84.3125	30.52083333
Amblyomma americanum	-84.3125	35.89583333
Amblyomma americanum	-84.27083333	30.47916667
Amblyomma americanum	-84.27083333	30.52083333
Amblyomma americanum	-84.27083333	37.5625
Amblyomma americanum	-84.22916667	30.27083333
Amblyomma americanum	-84.22916667	30.39583333
Amblyomma americanum	-84.22916667	30.64583333
Amblyomma americanum	-84.22916667	35.60416667
Amblyomma americanum	-84.22916667	37.52083333
Amblyomma americanum	-84.22916667	37.5625
Amblyomma americanum	-84.22916667	37.60416667
Amblyomma americanum	-84.1875	30.4375
Amblyomma americanum	-84.1875	30.47916667
Amblyomma americanum	-84.1875	33.47916667
Amblyomma americanum	-84.1875	33.64583333
Amblyomma americanum	-84.1875	37.52083333
Amblyomma americanum	-84.14583333	30.6875
Amblyomma americanum	-84.14583333	30.72916667
Amblyomma americanum	-84.14583333	30.9375
Amblyomma americanum	-84.14583333	33.5625
Amblyomma americanum	-84.14583333	33.64583333
Amblyomma americanum	-84.14583333	37.02083333
Amblyomma americanum	-84.10416667	33.6875
Amblyomma americanum	-84.10416667	35.60416667
Amblyomma americanum	-84.0625	30.52083333
Amblyomma americanum	-84.0625	35.9375
Amblyomma americanum	-84.02083333	33.97916667
Amblyomma americanum	-84.02083333	37.35416667
Amblyomma americanum	-84.02083333	39.8125
Amblyomma americanum	-83.97916667	30.10416667
Amblyomma americanum	-83.97916667	33.9375
Amblyomma americanum	-83.97916667	35.89583333
Amblyomma americanum	-83.9375	30.1875
Amblyomma americanum	-83.9375	33.9375
Amblyomma americanum	-83.9375	35.97916667
Amblyomma americanum	-83.9375	42.39583333
Amblyomma americanum	-83.85416667	36.1875
Amblyomma americanum	-83.8125	33.22916667
Amblyomma americanum	-83.8125	35.8125
Amblyomma americanum	-83.77083333	33.0625
Amblyomma americanum	-83.77083333	33.14583333
Amblyomma americanum	-83.77083333	33.35416667
Amblyomma americanum	-83.72916667	32.9375
Amblyomma americanum	-83.72916667	33.10416667
Amblyomma americanum	-83.72916667	33.4375
Amblyomma americanum	-83.72916667	33.47916667
Amblyomma americanum	-83.72916667	33.9375
Amblyomma americanum	-83.6875	35.9375
Amblyomma americanum	-83.64583333	32.8125
Amblyomma americanum	-83.60416667	32.85416667
Amblyomma americanum	-83.60416667	33.64583333
Amblyomma americanum	-83.60416667	33.6875
Amblyomma americanum	-83.5625	41.64583333
Amblyomma americanum	-83.52083333	32.77083333
Amblyomma americanum	-83.52083333	38.0625
Amblyomma americanum	-83.47916667	33.39583333
Amblyomma americanum	-83.47916667	33.97916667
Amblyomma americanum	-83.47916667	37.77083333
Amblyomma americanum	-83.39583333	33.89583333
Amblyomma americanum	-83.39583333	33.9375
Amblyomma americanum	-83.39583333	38.1875
Amblyomma americanum	-83.39583333	38.77083333
Amblyomma americanum	-83.35416667	33.77083333
Amblyomma americanum	-83.35416667	33.9375
Amblyomma americanum	-83.3125	29.85416667
Amblyomma americanum	-83.27083333	30.85416667
Amblyomma americanum	-83.27083333	32.97916667
Amblyomma americanum	-83.22916667	38.72916667
Amblyomma americanum	-83.1875	30.6875
Amblyomma americanum	-83.14583333	30.14583333
Amblyomma americanum	-83.14583333	30.6875
Amblyomma americanum	-83.14583333	33.35416667
Amblyomma americanum	-83.14583333	34.1875
Amblyomma americanum	-83.10416667	33.85416667
Amblyomma americanum	-83.02083333	29.14583333
Amblyomma americanum	-82.97916667	29.47916667
Amblyomma americanum	-82.97916667	33.27083333
Amblyomma americanum	-82.97916667	35.77083333
Amblyomma americanum	-82.97916667	39.9375
Amblyomma americanum	-82.9375	29.60416667
Amblyomma americanum	-82.89583333	32.14583333
Amblyomma americanum	-82.89583333	33.1875
Amblyomma americanum	-82.85416667	34.27083333
Amblyomma americanum	-82.85416667	34.6875
Amblyomma americanum	-82.85416667	36.10416667
Amblyomma americanum	-82.8125	38.60416667
Amblyomma americanum	-82.77083333	29.97916667
Amblyomma americanum	-82.77083333	35.35416667
Amblyomma americanum	-82.77083333	38.5625
Amblyomma americanum	-82.64583333	28.27083333
Amblyomma americanum	-82.64583333	28.4375
Amblyomma americanum	-82.64583333	29.8125
Amblyomma americanum	-82.64583333	41.8125
Amblyomma americanum	-82.60416667	28.1875
Amblyomma americanum	-82.60416667	29.5625
Amblyomma americanum	-82.60416667	29.85416667
Amblyomma americanum	-82.60416667	29.9375
Amblyomma americanum	-82.60416667	31.85416667
Amblyomma americanum	-82.60416667	34.10416667
Amblyomma americanum	-82.5625	29.8125
Amblyomma americanum	-82.5625	29.89583333
Amblyomma americanum	-82.5625	29.9375
Amblyomma americanum	-82.5625	38.64583333
Amblyomma americanum	-82.52083333	28.39583333
Amblyomma americanum	-82.52083333	29.8125
Amblyomma americanum	-82.52083333	38.9375
Amblyomma americanum	-82.47916667	28.3125
Amblyomma americanum	-82.47916667	29.72916667
Amblyomma americanum	-82.47916667	29.89583333
Amblyomma americanum	-82.4375	29.72916667
Amblyomma americanum	-82.4375	30.22916667
Amblyomma americanum	-82.39583333	28.4375
Amblyomma americanum	-82.39583333	29.60416667
Amblyomma americanum	-82.39583333	29.64583333
Amblyomma americanum	-82.39583333	29.6875
Amblyomma americanum	-82.39583333	33.02083333
Amblyomma americanum	-82.39583333	39.1875
Amblyomma americanum	-82.35416667	28.64583333
Amblyomma americanum	-82.35416667	29.60416667
Amblyomma americanum	-82.35416667	29.64583333
Amblyomma americanum	-82.35416667	29.6875
Amblyomma americanum	-82.35416667	29.72916667
Amblyomma americanum	-82.3125	29.60416667
Amblyomma americanum	-82.3125	29.64583333
Amblyomma americanum	-82.3125	33.6875
Amblyomma americanum	-82.27083333	29.52083333
Amblyomma americanum	-82.27083333	29.64583333
Amblyomma americanum	-82.27083333	29.72916667
Amblyomma americanum	-82.27083333	34.47916667
Amblyomma americanum	-82.22916667	29.6875
Amblyomma americanum	-82.22916667	29.72916667
Amblyomma americanum	-82.22916667	38.72916667
Amblyomma americanum	-82.22916667	39.52083333
Amblyomma americanum	-82.1875	29.5625
Amblyomma americanum	-82.1875	29.60416667
Amblyomma americanum	-82.1875	29.72916667
Amblyomma americanum	-82.1875	39.22916667
Amblyomma americanum	-82.14583333	29.47916667
Amblyomma americanum	-82.14583333	29.77083333
Amblyomma americanum	-82.14583333	33.52083333
Amblyomma americanum	-82.0625	28.27083333
Amblyomma americanum	-82.02083333	29.6875
Amblyomma americanum	-81.97916667	29.72916667
Amblyomma americanum	-81.97916667	29.8125
Amblyomma americanum	-81.97916667	29.85416667
Amblyomma americanum	-81.97916667	29.9375
Amblyomma americanum	-81.97916667	29.97916667
Amblyomma americanum	-81.97916667	30.89583333
Amblyomma americanum	-81.97916667	36.72916667
Amblyomma americanum	-81.9375	29.9375
Amblyomma americanum	-81.89583333	38.47916667
Amblyomma americanum	-81.85416667	29.27083333
Amblyomma americanum	-81.85416667	29.97916667
Amblyomma americanum	-81.85416667	32.39583333
Amblyomma americanum	-81.8125	30.0625
Amblyomma americanum	-81.72916667	28.02083333
Amblyomma americanum	-81.72916667	29.1875
Amblyomma americanum	-81.72916667	30.0625
Amblyomma americanum	-81.72916667	30.22916667
Amblyomma americanum	-81.72916667	30.97916667
Amblyomma americanum	-81.72916667	32.47916667
Amblyomma americanum	-81.6875	29.27083333
Amblyomma americanum	-81.6875	43.6875
Amblyomma americanum	-81.64583333	28.9375
Amblyomma americanum	-81.64583333	30.3125
Amblyomma americanum	-81.64583333	30.8125
Amblyomma americanum	-81.64583333	32.47916667
Amblyomma americanum	-81.60416667	31.97916667
Amblyomma americanum	-81.60416667	34.72916667
Amblyomma americanum	-81.60416667	35.89583333
Amblyomma americanum	-81.52083333	38.1875
Amblyomma americanum	-81.47916667	30.8125
Amblyomma americanum	-81.47916667	30.85416667
Amblyomma americanum	-81.47916667	44.4375
Amblyomma americanum	-81.4375	28.89583333
Amblyomma americanum	-81.4375	30.47916667
Amblyomma americanum	-81.4375	30.85416667
Amblyomma americanum	-81.4375	31.0625
Amblyomma americanum	-81.4375	31.64583333
Amblyomma americanum	-81.39583333	28.85416667
Amblyomma americanum	-81.39583333	29.89583333
Amblyomma americanum	-81.39583333	31.0625
Amblyomma americanum	-81.39583333	31.47916667
Amblyomma americanum	-81.39583333	41.52083333
Amblyomma americanum	-81.35416667	29.10416667
Amblyomma americanum	-81.35416667	41.14583333
Amblyomma americanum	-81.3125	28.52083333
Amblyomma americanum	-81.3125	28.64583333
Amblyomma americanum	-81.3125	41.14583333
Amblyomma americanum	-81.27083333	28.47916667
Amblyomma americanum	-81.27083333	28.85416667
Amblyomma americanum	-81.27083333	29.6875
Amblyomma americanum	-81.27083333	31.6875
Amblyomma americanum	-81.27083333	34.39583333
Amblyomma americanum	-81.22916667	29.4375
Amblyomma americanum	-81.22916667	29.47916667
Amblyomma americanum	-81.22916667	29.52083333
Amblyomma americanum	-81.22916667	31.47916667
Amblyomma americanum	-81.22916667	31.52083333
Amblyomma americanum	-81.22916667	32.47916667
Amblyomma americanum	-81.1875	29.22916667
Amblyomma americanum	-81.1875	31.60416667
Amblyomma americanum	-81.1875	31.89583333
Amblyomma americanum	-81.14583333	33.85416667
Amblyomma americanum	-81.10416667	28.6875
Amblyomma americanum	-81.10416667	29.22916667
Amblyomma americanum	-81.10416667	29.27083333
Amblyomma americanum	-81.10416667	31.85416667
Amblyomma americanum	-81.10416667	34.22916667
Amblyomma americanum	-81.0625	31.9375
Amblyomma americanum	-81.02083333	28.5625
Amblyomma americanum	-81.02083333	34.02083333
Amblyomma americanum	-81.02083333	41.0625
Amblyomma americanum	-80.97916667	28.5625
Amblyomma americanum	-80.97916667	33.64583333
Amblyomma americanum	-80.9375	34.89583333
Amblyomma americanum	-80.9375	34.9375
Amblyomma americanum	-80.85416667	26.72916667
Amblyomma americanum	-80.85416667	33.47916667
Amblyomma americanum	-80.85416667	35.22916667
Amblyomma americanum	-80.77083333	32.1875
Amblyomma americanum	-80.77083333	43.47916667
Amblyomma americanum	-80.72916667	32.14583333
Amblyomma americanum	-80.72916667	34.27083333
Amblyomma americanum	-80.6875	32.1875
Amblyomma americanum	-80.6875	32.4375
Amblyomma americanum	-80.6875	36.39583333
Amblyomma americanum	-80.5625	27.97916667
Amblyomma americanum	-80.47916667	32.35416667
Amblyomma americanum	-80.47916667	42.64583333
Amblyomma americanum	-80.35416667	32.6875
Amblyomma americanum	-80.35416667	37.1875
Amblyomma americanum	-80.3125	27.4375
Amblyomma americanum	-80.3125	35.97916667
Amblyomma americanum	-80.3125	36.85416667
Amblyomma americanum	-80.27083333	32.6875
Amblyomma americanum	-80.27083333	35.47916667
Amblyomma americanum	-80.1875	35.8125
Amblyomma americanum	-80.1875	36.8125
Amblyomma americanum	-80.14583333	32.72916667
Amblyomma americanum	-80.14583333	36.3125
Amblyomma americanum	-80.10416667	35.35416667
Amblyomma americanum	-80.10416667	35.8125
Amblyomma americanum	-80.10416667	37.4375
Amblyomma americanum	-80.0625	34.97916667
Amblyomma americanum	-80.0625	35.85416667
Amblyomma americanum	-80.0625	36.3125
Amblyomma americanum	-80.0625	36.39583333
Amblyomma americanum	-80.0625	42.1875
Amblyomma americanum	-80.02083333	35.52083333
Amblyomma americanum	-80.02083333	36.77083333
Amblyomma americanum	-80.02083333	37.1875
Amblyomma americanum	-79.97916667	36.10416667
Amblyomma americanum	-79.97916667	37.27083333
Amblyomma americanum	-79.97916667	37.35416667
Amblyomma americanum	-79.97916667	40.4375
Amblyomma americanum	-79.9375	32.77083333
Amblyomma americanum	-79.9375	32.8125
Amblyomma americanum	-79.9375	37.27083333
Amblyomma americanum	-79.9375	40.47916667
Amblyomma americanum	-79.89583333	34.3125
Amblyomma americanum	-79.89583333	36.14583333
Amblyomma americanum	-79.85416667	33.1875
Amblyomma americanum	-79.8125	36.27083333
Amblyomma americanum	-79.77083333	36.0625
Amblyomma americanum	-79.77083333	37.02083333
Amblyomma americanum	-79.5625	8.979166667
Amblyomma americanum	-79.52083333	36.10416667
Amblyomma americanum	-79.47916667	37.0625
Amblyomma americanum	-79.4375	35.35416667
Amblyomma americanum	-79.4375	35.72916667
Amblyomma americanum	-79.4375	35.97916667
Amblyomma americanum	-79.39583333	33.60416667
Amblyomma americanum	-79.35416667	35.8125
Amblyomma americanum	-79.3125	36.10416667
Amblyomma americanum	-79.27083333	37.35416667
Amblyomma americanum	-79.27083333	40.14583333
Amblyomma americanum	-79.22916667	36.4375
Amblyomma americanum	-79.22916667	37.4375
Amblyomma americanum	-79.1875	35.14583333
Amblyomma americanum	-79.1875	35.47916667
Amblyomma americanum	-79.1875	35.6875
Amblyomma americanum	-79.1875	35.72916667
Amblyomma americanum	-79.1875	35.89583333
Amblyomma americanum	-79.1875	35.9375
Amblyomma americanum	-79.1875	37.89583333
Amblyomma americanum	-79.14583333	35.60416667
Amblyomma americanum	-79.14583333	37.35416667
Amblyomma americanum	-79.14583333	37.39583333
Amblyomma americanum	-79.10416667	35.6875
Amblyomma americanum	-79.10416667	35.8125
Amblyomma americanum	-79.10416667	36.02083333
Amblyomma americanum	-79.10416667	36.77083333
Amblyomma americanum	-79.0625	35.72916667
Amblyomma americanum	-79.0625	35.89583333
Amblyomma americanum	-79.0625	35.9375
Amblyomma americanum	-79.02083333	35.89583333
Amblyomma americanum	-78.97916667	35.35416667
Amblyomma americanum	-78.97916667	35.89583333
Amblyomma americanum	-78.97916667	35.97916667
Amblyomma americanum	-78.9375	33.64583333
Amblyomma americanum	-78.9375	35.60416667
Amblyomma americanum	-78.9375	35.8125
Amblyomma americanum	-78.9375	35.89583333
Amblyomma americanum	-78.9375	35.97916667
Amblyomma americanum	-78.9375	36.02083333
Amblyomma americanum	-78.89583333	33.6875
Amblyomma americanum	-78.89583333	35.0625
Amblyomma americanum	-78.89583333	35.22916667
Amblyomma americanum	-78.89583333	37.72916667
Amblyomma americanum	-78.85416667	36.0625
Amblyomma americanum	-78.85416667	36.14583333
Amblyomma americanum	-78.8125	35.0625
Amblyomma americanum	-78.8125	35.52083333
Amblyomma americanum	-78.8125	38.22916667
Amblyomma americanum	-78.77083333	35.39583333
Amblyomma americanum	-78.77083333	35.72916667
Amblyomma americanum	-78.77083333	35.9375
Amblyomma americanum	-78.72916667	35.52083333
Amblyomma americanum	-78.72916667	35.64583333
Amblyomma americanum	-78.72916667	35.72916667
Amblyomma americanum	-78.72916667	35.77083333
Amblyomma americanum	-78.72916667	38.39583333
Amblyomma americanum	-78.72916667	39.8125
Amblyomma americanum	-78.6875	35.97916667
Amblyomma americanum	-78.6875	36.6875
Amblyomma americanum	-78.6875	38.0625
Amblyomma americanum	-78.64583333	35.77083333
Amblyomma americanum	-78.64583333	36.6875
Amblyomma americanum	-78.60416667	34.14583333
Amblyomma americanum	-78.60416667	34.22916667
Amblyomma americanum	-78.5625	35.77083333
Amblyomma americanum	-78.5625	36.60416667
Amblyomma americanum	-78.5625	37.5625
Amblyomma americanum	-78.52083333	35.77083333
Amblyomma americanum	-78.52083333	38.02083333
Amblyomma americanum	-78.52083333	38.0625
Amblyomma americanum	-78.47916667	35.8125
Amblyomma americanum	-78.47916667	37.02083333
Amblyomma americanum	-78.47916667	37.22916667
Amblyomma americanum	-78.47916667	37.89583333
Amblyomma americanum	-78.47916667	38.02083333
Amblyomma americanum	-78.47916667	38.10416667
Amblyomma americanum	-78.4375	36.39583333
Amblyomma americanum	-78.4375	37.1875
Amblyomma americanum	-78.4375	37.22916667
Amblyomma americanum	-78.39583333	35.9375
Amblyomma americanum	-78.39583333	37.85416667
Amblyomma americanum	-78.39583333	37.97916667
Amblyomma americanum	-78.39583333	38.1875
Amblyomma americanum	-78.35416667	37.77083333
Amblyomma americanum	-78.3125	36.60416667
Amblyomma americanum	-78.3125	37.89583333
Amblyomma americanum	-78.3125	38.52083333
Amblyomma americanum	-78.3125	38.85416667
Amblyomma americanum	-78.27083333	37.02083333
Amblyomma americanum	-78.27083333	37.8125
Amblyomma americanum	-78.22916667	38.4375
Amblyomma americanum	-78.22916667	38.85416667
Amblyomma americanum	-78.1875	38.9375
Amblyomma americanum	-78.1875	39.1875
Amblyomma americanum	-78.14583333	34.47916667
Amblyomma americanum	-78.14583333	38.52083333
Amblyomma americanum	-78.14583333	39.0625
Amblyomma americanum	-78.14583333	39.1875
Amblyomma americanum	-78.10416667	34.47916667
Amblyomma americanum	-78.0625	34.02083333
Amblyomma americanum	-78.02083333	35.64583333
Amblyomma americanum	-78.02083333	41.5625
Amblyomma americanum	-77.97916667	35.97916667
Amblyomma americanum	-77.97916667	37.0625
Amblyomma americanum	-77.97916667	38.3125
Amblyomma americanum	-77.97916667	38.6875
Amblyomma americanum	-77.9375	33.97916667
Amblyomma americanum	-77.9375	35.6875
Amblyomma americanum	-77.9375	35.72916667
Amblyomma americanum	-77.9375	37.0625
Amblyomma americanum	-77.9375	38.02083333
Amblyomma americanum	-77.89583333	34.52083333
Amblyomma americanum	-77.89583333	35.22916667
Amblyomma americanum	-77.89583333	35.72916667
Amblyomma americanum	-77.89583333	37.35416667
Amblyomma americanum	-77.89583333	37.5625
Amblyomma americanum	-77.85416667	37.89583333
Amblyomma americanum	-77.8125	38.77083333
Amblyomma americanum	-77.77083333	37.3125
Amblyomma americanum	-77.77083333	38.47916667
Amblyomma americanum	-77.72916667	39.64583333
Amblyomma americanum	-77.6875	37.39583333
Amblyomma americanum	-77.6875	38.89583333
Amblyomma americanum	-77.6875	38.9375
Amblyomma americanum	-77.64583333	37.4375
Amblyomma americanum	-77.64583333	37.52083333
Amblyomma americanum	-77.64583333	37.72916667
Amblyomma americanum	-77.64583333	38.77083333
Amblyomma americanum	-77.64583333	38.85416667
Amblyomma americanum	-77.60416667	38.64583333
Amblyomma americanum	-77.60416667	38.77083333
Amblyomma americanum	-77.5625	37.35416667
Amblyomma americanum	-77.5625	37.60416667
Amblyomma americanum	-77.5625	38.85416667
Amblyomma americanum	-77.5625	38.9375
Amblyomma americanum	-77.5625	38.97916667
Amblyomma americanum	-77.52083333	37.60416667
Amblyomma americanum	-77.52083333	37.64583333
Amblyomma americanum	-77.52083333	38.27083333
Amblyomma americanum	-77.52083333	38.60416667
Amblyomma americanum	-77.52083333	38.64583333
Amblyomma americanum	-77.52083333	38.77083333
Amblyomma americanum	-77.52083333	38.8125
Amblyomma americanum	-77.52083333	38.85416667
Amblyomma americanum	-77.52083333	38.89583333
Amblyomma americanum	-77.52083333	38.9375
Amblyomma americanum	-77.52083333	39.02083333
Amblyomma americanum	-77.52083333	39.0625
Amblyomma americanum	-77.52083333	39.10416667
Amblyomma americanum	-77.52083333	39.14583333
Amblyomma americanum	-77.47916667	34.6875
Amblyomma americanum	-77.47916667	36.77083333
Amblyomma americanum	-77.47916667	37.3125
Amblyomma americanum	-77.47916667	37.5625
Amblyomma americanum	-77.47916667	37.60416667
Amblyomma americanum	-77.47916667	37.6875
Amblyomma americanum	-77.47916667	38.8125
Amblyomma americanum	-77.47916667	38.85416667
Amblyomma americanum	-77.47916667	38.89583333
Amblyomma americanum	-77.47916667	38.97916667
Amblyomma americanum	-77.47916667	39.0625
Amblyomma americanum	-77.47916667	39.10416667
Amblyomma americanum	-77.4375	36.77083333
Amblyomma americanum	-77.4375	38.77083333
Amblyomma americanum	-77.4375	38.8125
Amblyomma americanum	-77.4375	38.85416667
Amblyomma americanum	-77.4375	38.9375
Amblyomma americanum	-77.4375	38.97916667
Amblyomma americanum	-77.4375	39.10416667
Amblyomma americanum	-77.39583333	34.52083333
Amblyomma americanum	-77.39583333	38.0625
Amblyomma americanum	-77.39583333	38.47916667
Amblyomma americanum	-77.39583333	38.60416667
Amblyomma americanum	-77.39583333	38.77083333
Amblyomma americanum	-77.39583333	38.85416667
Amblyomma americanum	-77.39583333	38.9375
Amblyomma americanum	-77.39583333	39.02083333
Amblyomma americanum	-77.35416667	34.6875
Amblyomma americanum	-77.35416667	35.60416667
Amblyomma americanum	-77.35416667	38.52083333
Amblyomma americanum	-77.35416667	38.77083333
Amblyomma americanum	-77.35416667	38.89583333
Amblyomma americanum	-77.35416667	38.97916667
Amblyomma americanum	-77.3125	34.60416667
Amblyomma americanum	-77.3125	37.52083333
Amblyomma americanum	-77.3125	38.0625
Amblyomma americanum	-77.3125	38.10416667
Amblyomma americanum	-77.3125	38.27083333
Amblyomma americanum	-77.3125	38.35416667
Amblyomma americanum	-77.3125	38.52083333
Amblyomma americanum	-77.3125	38.9375
Amblyomma americanum	-77.3125	38.97916667
Amblyomma americanum	-77.27083333	36.27083333
Amblyomma americanum	-77.27083333	38.10416667
Amblyomma americanum	-77.27083333	38.4375
Amblyomma americanum	-77.27083333	38.6875
Amblyomma americanum	-77.27083333	38.9375
Amblyomma americanum	-77.27083333	39.02083333
Amblyomma americanum	-77.27083333	39.8125
Amblyomma americanum	-77.22916667	37.3125
Amblyomma americanum	-77.22916667	37.4375
Amblyomma americanum	-77.22916667	38.64583333
Amblyomma americanum	-77.22916667	38.6875
Amblyomma americanum	-77.22916667	38.72916667
Amblyomma americanum	-77.22916667	38.97916667
Amblyomma americanum	-77.22916667	39.0625
Amblyomma americanum	-77.1875	36.89583333
Amblyomma americanum	-77.1875	37.3125
Amblyomma americanum	-77.1875	38.64583333
Amblyomma americanum	-77.1875	38.6875
Amblyomma americanum	-77.1875	38.89583333
Amblyomma americanum	-77.14583333	35.0625
Amblyomma americanum	-77.14583333	38.4375
Amblyomma americanum	-77.14583333	38.60416667
Amblyomma americanum	-77.14583333	38.6875
Amblyomma americanum	-77.14583333	38.77083333
Amblyomma americanum	-77.14583333	39.14583333
Amblyomma americanum	-77.14583333	39.3125
Amblyomma americanum	-77.14583333	40.14583333
Amblyomma americanum	-77.10416667	38.60416667
Amblyomma americanum	-77.10416667	38.72916667
Amblyomma americanum	-77.10416667	38.85416667
Amblyomma americanum	-77.10416667	38.89583333
Amblyomma americanum	-77.0625	36.9375
Amblyomma americanum	-77.0625	36.97916667
Amblyomma americanum	-77.0625	37.35416667
Amblyomma americanum	-77.0625	38.9375
Amblyomma americanum	-77.02083333	38.47916667
Amblyomma americanum	-77.02083333	38.6875
Amblyomma americanum	-77.02083333	38.8125
Amblyomma americanum	-77.02083333	38.89583333
Amblyomma americanum	-77.02083333	38.97916667
Amblyomma americanum	-77.02083333	39.02083333
Amblyomma americanum	-76.97916667	34.85416667
Amblyomma americanum	-76.97916667	35.35416667
Amblyomma americanum	-76.97916667	38.6875
Amblyomma americanum	-76.97916667	38.85416667
Amblyomma americanum	-76.97916667	38.9375
Amblyomma americanum	-76.97916667	38.97916667
Amblyomma americanum	-76.9375	34.9375
Amblyomma americanum	-76.9375	37.35416667
Amblyomma americanum	-76.9375	37.39583333
Amblyomma americanum	-76.9375	38.97916667
Amblyomma americanum	-76.9375	39.02083333
Amblyomma americanum	-76.9375	39.0625
Amblyomma americanum	-76.9375	39.10416667
Amblyomma americanum	-76.9375	39.1875
Amblyomma americanum	-76.89583333	34.8125
Amblyomma americanum	-76.89583333	38.85416667
Amblyomma americanum	-76.89583333	39.02083333
Amblyomma americanum	-76.89583333	43.9375
Amblyomma americanum	-76.85416667	38.35416667
Amblyomma americanum	-76.85416667	38.8125
Amblyomma americanum	-76.85416667	39.02083333
Amblyomma americanum	-76.85416667	39.10416667
Amblyomma americanum	-76.85416667	39.1875
Amblyomma americanum	-76.85416667	39.27083333
Amblyomma americanum	-76.85416667	39.35416667
Amblyomma americanum	-76.8125	35.02083333
Amblyomma americanum	-76.8125	37.02083333
Amblyomma americanum	-76.8125	37.52083333
Amblyomma americanum	-76.8125	38.60416667
Amblyomma americanum	-76.8125	38.64583333
Amblyomma americanum	-76.8125	38.72916667
Amblyomma americanum	-76.8125	38.97916667
Amblyomma americanum	-76.8125	39.02083333
Amblyomma americanum	-76.8125	39.0625
Amblyomma americanum	-76.8125	39.14583333
Amblyomma americanum	-76.8125	39.22916667
Amblyomma americanum	-76.8125	39.39583333
Amblyomma americanum	-76.77083333	36.8125
Amblyomma americanum	-76.77083333	36.97916667
Amblyomma americanum	-76.77083333	37.22916667
Amblyomma americanum	-76.77083333	37.27083333
Amblyomma americanum	-76.77083333	38.60416667
Amblyomma americanum	-76.77083333	38.64583333
Amblyomma americanum	-76.77083333	39.02083333
Amblyomma americanum	-76.77083333	39.0625
Amblyomma americanum	-76.77083333	39.3125
Amblyomma americanum	-76.72916667	36.97916667
Amblyomma americanum	-76.72916667	37.3125
Amblyomma americanum	-76.72916667	37.39583333
Amblyomma americanum	-76.72916667	38.52083333
Amblyomma americanum	-76.72916667	38.77083333
Amblyomma americanum	-76.72916667	38.85416667
Amblyomma americanum	-76.6875	38.0625
Amblyomma americanum	-76.6875	38.77083333
Amblyomma americanum	-76.6875	39.14583333
Amblyomma americanum	-76.6875	39.22916667
Amblyomma americanum	-76.6875	39.60416667
Amblyomma americanum	-76.64583333	37.3125
Amblyomma americanum	-76.64583333	38.0625
Amblyomma americanum	-76.64583333	38.6875
Amblyomma americanum	-76.64583333	39.0625
Amblyomma americanum	-76.64583333	39.35416667
Amblyomma americanum	-76.60416667	35.52083333
Amblyomma americanum	-76.60416667	35.6875
Amblyomma americanum	-76.60416667	36.0625
Amblyomma americanum	-76.60416667	36.72916667
Amblyomma americanum	-76.60416667	38.6875
Amblyomma americanum	-76.60416667	39.0625
Amblyomma americanum	-76.60416667	39.14583333
Amblyomma americanum	-76.60416667	39.22916667
Amblyomma americanum	-76.60416667	39.3125
Amblyomma americanum	-76.5625	37.1875
Amblyomma americanum	-76.5625	38.47916667
Amblyomma americanum	-76.5625	38.89583333
Amblyomma americanum	-76.5625	38.97916667
Amblyomma americanum	-76.5625	39.52083333
Amblyomma americanum	-76.52083333	37.0625
Amblyomma americanum	-76.52083333	37.39583333
Amblyomma americanum	-76.52083333	37.72916667
Amblyomma americanum	-76.52083333	37.77083333
Amblyomma americanum	-76.52083333	38.27083333
Amblyomma americanum	-76.52083333	38.3125
Amblyomma americanum	-76.52083333	38.35416667
Amblyomma americanum	-76.52083333	38.8125
Amblyomma americanum	-76.52083333	39.1875
Amblyomma americanum	-76.52083333	39.22916667
Amblyomma americanum	-76.52083333	39.3125
Amblyomma americanum	-76.52083333	39.4375
Amblyomma americanum	-76.47916667	37.0625
Amblyomma americanum	-76.47916667	37.14583333
Amblyomma americanum	-76.47916667	37.5625
Amblyomma americanum	-76.47916667	37.60416667
Amblyomma americanum	-76.47916667	38.97916667
Amblyomma americanum	-76.47916667	42.4375
Amblyomma americanum	-76.4375	38.35416667
Amblyomma americanum	-76.4375	38.39583333
Amblyomma americanum	-76.4375	38.9375
Amblyomma americanum	-76.4375	39.0625
Amblyomma americanum	-76.4375	39.10416667
Amblyomma americanum	-76.4375	39.22916667
Amblyomma americanum	-76.39583333	36.5625
Amblyomma americanum	-76.39583333	37.0625
Amblyomma americanum	-76.39583333	39.02083333
Amblyomma americanum	-76.35416667	37.02083333
Amblyomma americanum	-76.35416667	37.89583333
Amblyomma americanum	-76.3125	37.0625
Amblyomma americanum	-76.3125	38.9375
Amblyomma americanum	-76.3125	39.4375
Amblyomma americanum	-76.27083333	36.6875
Amblyomma americanum	-76.27083333	37.35416667
Amblyomma americanum	-76.22916667	39.4375
Amblyomma americanum	-76.1875	36.5625
Amblyomma americanum	-76.1875	36.8125
Amblyomma americanum	-76.14583333	38.89583333
Amblyomma americanum	-76.14583333	39.52083333
Amblyomma americanum	-76.14583333	44.0625
Amblyomma americanum	-76.10416667	38.85416667
Amblyomma americanum	-76.10416667	39.47916667
Amblyomma americanum	-76.0625	39.02083333
Amblyomma americanum	-76.0625	39.72916667
Amblyomma americanum	-76.02083333	35.52083333
Amblyomma americanum	-76.02083333	36.77083333
Amblyomma americanum	-75.97916667	37.14583333
Amblyomma americanum	-75.97916667	39.47916667
Amblyomma americanum	-75.9375	38.52083333
Amblyomma americanum	-75.9375	38.97916667
Amblyomma americanum	-75.9375	39.72916667
Amblyomma americanum	-75.85416667	36.4375
Amblyomma americanum	-75.85416667	38.85416667
Amblyomma americanum	-75.8125	37.52083333
Amblyomma americanum	-75.8125	38.22916667
Amblyomma americanum	-75.8125	39.27083333
Amblyomma americanum	-75.8125	39.97916667
Amblyomma americanum	-75.77083333	38.47916667
Amblyomma americanum	-75.77083333	38.72916667
Amblyomma americanum	-75.77083333	39.27083333
Amblyomma americanum	-75.77083333	39.97916667
Amblyomma americanum	-75.72916667	38.72916667
Amblyomma americanum	-75.72916667	38.77083333
Amblyomma americanum	-75.72916667	39.0625
Amblyomma americanum	-75.72916667	39.10416667
Amblyomma americanum	-75.72916667	39.6875
Amblyomma americanum	-75.6875	35.89583333
Amblyomma americanum	-75.64583333	35.9375
Amblyomma americanum	-75.64583333	37.6875
Amblyomma americanum	-75.64583333	39.5625
Amblyomma americanum	-75.64583333	39.64583333
Amblyomma americanum	-75.60416667	35.22916667
Amblyomma americanum	-75.5625	35.27083333
Amblyomma americanum	-75.5625	38.5625
Amblyomma americanum	-75.5625	38.64583333
Amblyomma americanum	-75.5625	38.97916667
Amblyomma americanum	-75.5625	39.10416667
Amblyomma americanum	-75.5625	39.64583333
Amblyomma americanum	-75.5625	39.77083333
Amblyomma americanum	-75.52083333	35.27083333
Amblyomma americanum	-75.52083333	38.0625
Amblyomma americanum	-75.52083333	39.10416667
Amblyomma americanum	-75.47916667	38.27083333
Amblyomma americanum	-75.47916667	39.10416667
Amblyomma americanum	-75.47916667	39.14583333
Amblyomma americanum	-75.47916667	39.27083333
Amblyomma americanum	-75.4375	38.14583333
Amblyomma americanum	-75.4375	38.27083333
Amblyomma americanum	-75.4375	38.35416667
Amblyomma americanum	-75.4375	39.14583333
Amblyomma americanum	-75.4375	40.02083333
Amblyomma americanum	-75.39583333	38.22916667
Amblyomma americanum	-75.39583333	38.6875
Amblyomma americanum	-75.39583333	38.72916667
Amblyomma americanum	-75.35416667	38.5625
Amblyomma americanum	-75.35416667	38.6875
Amblyomma americanum	-75.3125	38.22916667
Amblyomma americanum	-75.3125	38.64583333
Amblyomma americanum	-75.27083333	38.5625
Amblyomma americanum	-75.27083333	39.89583333
Amblyomma americanum	-75.22916667	39.8125
Amblyomma americanum	-75.22916667	39.9375
Amblyomma americanum	-75.1875	38.10416667
Amblyomma americanum	-75.1875	39.3125
Amblyomma americanum	-75.1875	39.85416667
Amblyomma americanum	-75.14583333	38.22916667
Amblyomma americanum	-75.14583333	38.35416667
Amblyomma americanum	-75.14583333	38.77083333
Amblyomma americanum	-75.14583333	39.52083333
Amblyomma americanum	-75.14583333	39.60416667
Amblyomma americanum	-75.14583333	39.72916667
Amblyomma americanum	-75.14583333	39.77083333
Amblyomma americanum	-75.10416667	38.77083333
Amblyomma americanum	-75.10416667	40.14583333
Amblyomma americanum	-75.0625	38.52083333
Amblyomma americanum	-75.0625	38.60416667
Amblyomma americanum	-74.97916667	38.9375
Amblyomma americanum	-74.97916667	38.97916667
Amblyomma americanum	-74.97916667	39.14583333
Amblyomma americanum	-74.97916667	39.8125
Amblyomma americanum	-74.97916667	39.85416667
Amblyomma americanum	-74.9375	38.97916667
Amblyomma americanum	-74.9375	39.5625
Amblyomma americanum	-74.9375	39.89583333
Amblyomma americanum	-74.9375	39.97916667
Amblyomma americanum	-74.89583333	38.9375
Amblyomma americanum	-74.89583333	39.02083333
Amblyomma americanum	-74.89583333	39.52083333
Amblyomma americanum	-74.89583333	39.5625
Amblyomma americanum	-74.89583333	40.10416667
Amblyomma americanum	-74.85416667	39.22916667
Amblyomma americanum	-74.8125	39.10416667
Amblyomma americanum	-74.8125	39.6875
Amblyomma americanum	-74.8125	39.97916667
Amblyomma americanum	-74.8125	40.02083333
Amblyomma americanum	-74.77083333	39.3125
Amblyomma americanum	-74.77083333	39.64583333
Amblyomma americanum	-74.77083333	39.8125
Amblyomma americanum	-74.77083333	39.85416667
Amblyomma americanum	-74.77083333	40.02083333
Amblyomma americanum	-74.72916667	39.4375
Amblyomma americanum	-74.72916667	39.85416667
Amblyomma americanum	-74.72916667	39.89583333
Amblyomma americanum	-74.72916667	40.4375
Amblyomma americanum	-74.6875	39.47916667
Amblyomma americanum	-74.6875	39.72916667
Amblyomma americanum	-74.6875	40.10416667
Amblyomma americanum	-74.6875	40.60416667
Amblyomma americanum	-74.64583333	39.89583333
Amblyomma americanum	-74.64583333	39.9375
Amblyomma americanum	-74.64583333	40.27083333
Amblyomma americanum	-74.60416667	39.52083333
Amblyomma americanum	-74.60416667	39.60416667
Amblyomma americanum	-74.60416667	39.64583333
Amblyomma americanum	-74.60416667	39.85416667
Amblyomma americanum	-74.60416667	39.89583333
Amblyomma americanum	-74.5625	39.89583333
Amblyomma americanum	-74.5625	39.97916667
Amblyomma americanum	-74.5625	40.9375
Amblyomma americanum	-74.52083333	39.3125
Amblyomma americanum	-74.52083333	39.97916667
Amblyomma americanum	-74.52083333	40.14583333
Amblyomma americanum	-74.52083333	40.3125
Amblyomma americanum	-74.47916667	40.39583333
Amblyomma americanum	-74.4375	39.35416667
Amblyomma americanum	-74.4375	39.47916667
Amblyomma americanum	-74.4375	39.97916667
Amblyomma americanum	-74.4375	40.22916667
Amblyomma americanum	-74.4375	40.39583333
Amblyomma americanum	-74.4375	40.47916667
Amblyomma americanum	-74.4375	40.52083333
Amblyomma americanum	-74.39583333	39.89583333
Amblyomma americanum	-74.39583333	40.3125
Amblyomma americanum	-74.39583333	40.4375
Amblyomma americanum	-74.39583333	40.9375
Amblyomma americanum	-74.35416667	39.60416667
Amblyomma americanum	-74.35416667	39.77083333
Amblyomma americanum	-74.35416667	40.27083333
Amblyomma americanum	-74.3125	40.27083333
Amblyomma americanum	-74.27083333	39.77083333
Amblyomma americanum	-74.27083333	40.27083333
Amblyomma americanum	-74.27083333	40.3125
Amblyomma americanum	-74.27083333	40.47916667
Amblyomma americanum	-74.22916667	39.9375
Amblyomma americanum	-74.22916667	40.1875
Amblyomma americanum	-74.22916667	40.47916667
Amblyomma americanum	-74.22916667	40.52083333
Amblyomma americanum	-74.22916667	40.5625
Amblyomma americanum	-74.1875	39.97916667
Amblyomma americanum	-74.1875	40.02083333
Amblyomma americanum	-74.1875	40.1875
Amblyomma americanum	-74.1875	40.27083333
Amblyomma americanum	-74.1875	40.39583333
Amblyomma americanum	-74.14583333	39.9375
Amblyomma americanum	-74.14583333	39.97916667
Amblyomma americanum	-74.14583333	40.14583333
Amblyomma americanum	-74.14583333	40.22916667
Amblyomma americanum	-74.14583333	40.27083333
Amblyomma americanum	-74.14583333	40.3125
Amblyomma americanum	-74.10416667	38.77083333
Amblyomma americanum	-74.10416667	39.97916667
Amblyomma americanum	-74.10416667	40.0625
Amblyomma americanum	-74.10416667	40.14583333
Amblyomma americanum	-74.10416667	40.1875
Amblyomma americanum	-74.10416667	40.22916667
Amblyomma americanum	-74.10416667	40.27083333
Amblyomma americanum	-74.10416667	40.39583333
Amblyomma americanum	-74.10416667	40.60416667
Amblyomma americanum	-74.10416667	41.52083333
Amblyomma americanum	-74.0625	40.22916667
Amblyomma americanum	-74.02083333	40.10416667
Amblyomma americanum	-74.02083333	40.22916667
Amblyomma americanum	-74.02083333	40.3125
Amblyomma americanum	-74.02083333	40.35416667
Amblyomma americanum	-74.02083333	40.39583333
Amblyomma americanum	-74.02083333	40.60416667
Amblyomma americanum	-73.52083333	40.6875
Amblyomma americanum	-73.47916667	40.77083333
Amblyomma americanum	-73.4375	40.8125
Amblyomma americanum	-73.3125	43.1875
Amblyomma americanum	-73.1875	40.72916667
Amblyomma americanum	-73.14583333	40.64583333
Amblyomma americanum	-73.14583333	40.72916667
Amblyomma americanum	-73.14583333	40.77083333
Amblyomma americanum	-73.14583333	40.9375
Amblyomma americanum	-73.14583333	41.14583333
Amblyomma americanum	-73.10416667	40.9375
Amblyomma americanum	-73.0625	40.64583333
Amblyomma americanum	-72.97916667	40.6875
Amblyomma americanum	-72.97916667	40.97916667
Amblyomma americanum	-72.9375	40.9375
Amblyomma americanum	-72.89583333	40.72916667
Amblyomma americanum	-72.8125	40.85416667
Amblyomma americanum	-72.8125	40.89583333
Amblyomma americanum	-72.8125	40.97916667
Amblyomma americanum	-72.77083333	40.85416667
Amblyomma americanum	-72.77083333	40.89583333
Amblyomma americanum	-72.6875	40.8125
Amblyomma americanum	-72.6875	40.89583333
Amblyomma americanum	-72.6875	40.9375
Amblyomma americanum	-72.60416667	42.64583333
Amblyomma americanum	-72.5625	40.85416667
Amblyomma americanum	-72.5625	40.97916667
Amblyomma americanum	-72.52083333	40.97916667
Amblyomma americanum	-72.4375	41.02083333
Amblyomma americanum	-72.39583333	42.5625
Amblyomma americanum	-72.35416667	41.0625
Amblyomma americanum	-72.3125	41.0625
Amblyomma americanum	-72.1875	41.3125
Amblyomma americanum	-71.9375	41.02083333
Amblyomma americanum	-71.72916667	18.02083333
Amblyomma americanum	-71.60416667	41.39583333
Amblyomma americanum	-71.52083333	42.52083333
Amblyomma americanum	-71.39583333	42.47916667
Amblyomma americanum	-71.3125	41.60416667
Amblyomma americanum	-71.27083333	41.6875
Amblyomma americanum	-71.27083333	44.64583333
Amblyomma americanum	-71.10416667	42.3125
Amblyomma americanum	-71.0625	43.02083333
Amblyomma americanum	-70.77083333	41.3125
Amblyomma americanum	-70.72916667	41.35416667
Amblyomma americanum	-70.6875	41.52083333
Amblyomma americanum	-70.6875	43.4375
Amblyomma americanum	-70.5625	41.35416667
Amblyomma americanum	-70.5625	44.22916667
Amblyomma americanum	-70.52083333	41.64583333
Amblyomma americanum	-70.4375	41.64583333
Amblyomma americanum	-70.27083333	41.3125
